# Supplementary material for: Nonlinear optical properties of intriguing Ru σ-acetylide complexes and the use of a photocrosslinked polymer as a springboard to obtain SHG active thin films
Source: Royal Society of Chemistry journal article supplement (doi:10.1039/c6dt01762b), 2016-01-01
Supplement: c6dt01762b1.pdf [file c6dt01762b1.pdf]

## **Nonlinear optical properties of intriguing Ru $\sigma$ -acetylides complexes and the use of a photocrosslinked polymer as a springboard to obtain SHG active thin films.**

Alessia Colombo,<sup>a,b</sup> Claudia Dragonetti,<sup>a,b,c\*</sup> Daniele Marinotto,<sup>b,c</sup> Stefania Righetto,<sup>a,b</sup> Gianmarco Griffini,<sup>d</sup> Stefano Turri,<sup>d</sup> Huriye Akdas-Kilig,<sup>e</sup> Jean-Luc Fillaut,<sup>e\*</sup> Anissa Amar,<sup>e,f</sup> Abdou Boucekkine,<sup>e</sup> Claudine Katan<sup>e\*</sup>

*<sup>a</sup> Dipartimento di Chimica dell'Università degli Studi di Milano,*

*<sup>b</sup> UdR INSTM and Centro di Eccellenza CIMAINA dell'Università degli Studi di Milano,*

*and <sup>c</sup> ISTM-CNR, via Golgi 19, 20133 Milano, Italy.*

*<sup>d</sup> Department of Chemistry, Materials and Chemical Engineering Giulio Natta, Politecnico di Milano, Piazza Leonardo da Vinci 32, 20133, Milano, Italy.*

*<sup>e</sup> Institut des Sciences Chimiques de Rennes, ISCR, UMR 6226, CNRS, Université de Rennes 1, 35042, Rennes, France*

*<sup>f</sup> Département de Chimie, UMMTO, 15000 Tizi-Ouzou, Algeria.*

**Table S1.** Computed photo-physical properties using various levels of theory .....**Page 2**

**Fig S1.** In situ corona-wire poling dynamic of a PS film containing complex 2.....**Page 3**

**Table S1.** Calculated electronic properties for complexes 1' and 2' at different levels of theory: transition energy ( $\omega_{01}$ ) and dipole moment ( $\mu_{01}^z$ ), ground ( $\mu_{00}^z$ ) and excited ( $\mu_{11}^z$ ) state dipole moment, first ( $\beta_{zzz}(-2\omega; \omega, \omega)$ ) and second ( $\gamma_{zzzz}(-2\omega; \omega, \omega, 0)$ ) hyperpolarisabilities relevant to compute the EFISH contributions (eqn 1), cubic diagonal term ( $\gamma_{zzzz}(-3\omega; \omega, \omega, \omega)$ ) relevant to THG experiments. The sum over states has been implemented according to Eqn. (22), (30) and (29) from Ref. [1], respectively. Superscript T and X stand for Taylor series and phenomenological convention, respectively. The bar (subscript *av*) indicates orientational averaging. We stress that according to Ref. [2],  $\gamma^X(-2\omega; \omega, \omega, 0) = \frac{1}{4}\gamma^T(-2\omega; \omega, \omega, 0)$ , while  $\gamma^X(-3\omega; \omega, \omega, \omega) = \frac{1}{24}\gamma^T(-3\omega; \omega, \omega, \omega)$ . Eq and NEq indicate that the TD-DFT calculations have been performed under equilibrium (all solvent degrees of freedom are relaxed) and non-equilibrium conditions, respectively.<sup>3</sup> The latter is a priori more relevant to the experiments conducted in this study.

| Compound                                                                                                 | 1'      |          |        |        | 2'      |          |                     |        |
|----------------------------------------------------------------------------------------------------------|---------|----------|--------|--------|---------|----------|---------------------|--------|
|                                                                                                          | DCM     | DCM      | DCM    | gas    | DCM     | DCM      | DCM                 | gas    |
| Properties                                                                                               | DCM(Eq) | DCM(NEq) | gas    | gas    | DCM(Eq) | DCM(NEq) | gas                 | gas    |
| $\omega_{01}$ (eV)                                                                                       | 2.264   | 2.367    | 2.597  | 2.639  | 2.307   | 2.408    | 2.662 <sup>#</sup>  | 2.634  |
| $\mu_{01}^z$ (D)                                                                                         | -14.96  | -14.08   | -10.20 | -11.82 | -16.00  | -15.22   | -13.73 <sup>#</sup> | -12.91 |
| $\mu_{00}^z$ (D)                                                                                         | +5.23   | +5.23    | +3.18  | +3.01  | +12.03  | +12.03   | +8.91               | +9.01  |
| $\mu_{11}^z$ (D)                                                                                         | -4.31   | -5.72    | -3.57  | -6.44  | +3.73   | +2.09    | +0.71 <sup>#</sup>  | +0.56  |
| $\beta_{zzz}^T(-2\omega; \omega, \omega)$ ( $10^{-28}$ esu)                                              | -8.03   | -7.03    | -1.69  | -3.03  | -2.59   | -7.05    | -3.46               | -3.25  |
| $\gamma_{zzzz}^T(-2\omega; \omega, \omega, 0)$ ( $10^{-33}$ esu)                                         | -12.49  | +0.59    | -1.37  | +0.58  | -7.13   | -9.58    | -6.23               | -3.56  |
| $\gamma_{zzzz}^T(-3\omega; \omega, \omega, \omega)$ ( $10^{-33}$ esu)                                    | -36.54  | -4.05    | -3.33  | -1.51  | -11.29  | -24.85   | -12.71              | -8.33  |
| $\bar{\gamma}_{av}^T(-2\omega; \omega, \omega, 0)$ ( $10^{-33}$ esu)                                     | -2.50   | +0.12    | -0.27  | +0.12  | -1.43   | -1.92    | -1.25               | -0.71  |
| $\bar{\gamma}_{av}^T(-3\omega; \omega, \omega, \omega)$ ( $10^{-33}$ esu)                                | -7.31   | -0.08    | -0.67  | -0.30  | -2.26   | -4.97    | -2.54               | -1.67  |
| $\bar{\gamma}_{av}^T(-3\omega; \omega, \omega, \omega)/\bar{\gamma}_{av}^T(-2\omega; \omega, \omega, 0)$ | +2.92   | -0.67    | +2.48  | -2.50  | +1.58   | +2.59    | +2.03               | +2.35  |
| $(\omega_{01} - 2\omega)/(\omega_{01} - 3\omega)$                                                        | +3.07   | +2.56    | +2.00  | +1.94  | +2.82   | +2.42    | +1.91               | +1.95  |
| $\beta_{zzz}^X(-2\omega; \omega, \omega)$ ( $10^{-28}$ esu)                                              | -2.03   | -1.76    | -0.42  | -0.76  | -0.65   | -1.76    | -0.87               | -0.81  |
| $\frac{\mu_{00}^z \beta_{zzz}^X(-2\omega; \omega, \omega)}{5kT}$ ( $10^{-33}$ esu)                       | -5.10   | -4.47    | -0.65  | -1.11  | -3.78   | -10.30   | -3.75               | -3.56  |
| $\gamma_{zzzz}^X(-2\omega; \omega, \omega, 0)$ ( $10^{-33}$ esu)                                         | -3.12   | +0.15    | -0.34  | +0.14  | -1.78   | -2.39    | -1.56               | -0.89  |

|                                            |       |        |       |       |       |        |       |       |
|--------------------------------------------|-------|--------|-------|-------|-------|--------|-------|-------|
| $\bar{\gamma}_{EFISH}^X$ ( $10^{-33}$ esu) | -0.62 | +0.03  | -0.07 | +0.03 | -0.36 | -0.48  | -0.31 | -0.18 |
| $\gamma_{EFISH}^{TOT,X}$ ( $10^{-33}$ esu) | -5.72 | -4.44  | -0.72 | -1.08 | -4.14 | -10.78 | -4.06 | -3.74 |
| $\bar{\gamma}_{THG}^X$ ( $10^{-33}$ esu)   | -0.30 | -0.003 | -0.03 | -0.01 | -0.09 | -0.20  | -0.11 | -0.07 |

# the bright excited state is the second one

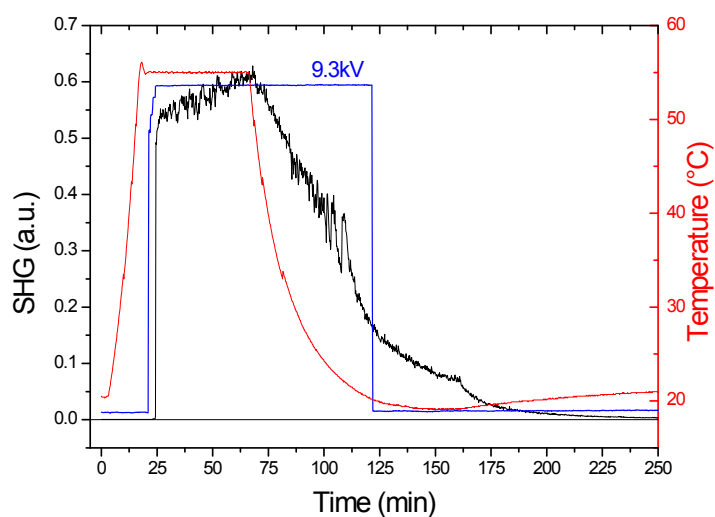

**Figure S1.** In situ corona-wire poling dynamic of a PS film containing complex **2**.

[1] A. Willets, J. E. Rice, D. M. Burland, D. P. Shelton, *J. Chem. Phys.* 1992, **97**, 7590.

[2] H. Reis, *J. Chem. Phys.*, 2006, **125**, 014506.

[3] (a) D. Jacquemin, C. Adamo, Computational Molecular Electronic Spectroscopy with TD-DFT, Topics in Current Chemistry, pp1-29, Springer Berlin Heidelberg 2015; (b) C. Katan, P. Savel, B. M. Wong, T. Roisnel, V. Dorcet, J.-L. Fillaut, D. Jacquemin, *Phys. Chem. Chem. Phys.* 2014, **16**, 9064.
